# Supplementary material for: Continuous monitoring of surgical bimanual expertise using deep neural networks in virtual reality simulation
Source: PubMed Central journal article supplement (PMC9042967; doi:10.1038/s41746-022-00596-8), 2022-04-26
Supplement: 41746_2022_596_MOESM1_ESM.pdf [file 41746_2022_596_MOESM1_ESM.pdf]

## Reporting Summary

Nature Portfolio wishes to improve the reproducibility of the work that we publish. This form provides structure for consistency and transparency in reporting. For further information on Nature Portfolio policies, see our [Editorial Policies](#) and the [Editorial Policy Checklist](#).

### Statistics

For all statistical analyses, confirm that the following items are present in the figure legend, table legend, main text, or Methods section.

- | n/a                                 | Confirmed                                                                                                                                                                                                                                                                                      |
|-------------------------------------|------------------------------------------------------------------------------------------------------------------------------------------------------------------------------------------------------------------------------------------------------------------------------------------------|
| <input type="checkbox"/>            | <input checked="" type="checkbox"/> The exact sample size ( $n$ ) for each experimental group/condition, given as a discrete number and unit of measurement                                                                                                                                    |
| <input type="checkbox"/>            | <input checked="" type="checkbox"/> A statement on whether measurements were taken from distinct samples or whether the same sample was measured repeatedly                                                                                                                                    |
| <input type="checkbox"/>            | <input checked="" type="checkbox"/> The statistical test(s) used AND whether they are one- or two-sided<br><i>Only common tests should be described solely by name; describe more complex techniques in the Methods section.</i>                                                               |
| <input checked="" type="checkbox"/> | <input type="checkbox"/> A description of all covariates tested                                                                                                                                                                                                                                |
| <input type="checkbox"/>            | <input checked="" type="checkbox"/> A description of any assumptions or corrections, such as tests of normality and adjustment for multiple comparisons                                                                                                                                        |
| <input type="checkbox"/>            | <input checked="" type="checkbox"/> A full description of the statistical parameters including central tendency (e.g. means) or other basic estimates (e.g. regression coefficient) AND variation (e.g. standard deviation) or associated estimates of uncertainty (e.g. confidence intervals) |
| <input type="checkbox"/>            | <input checked="" type="checkbox"/> For null hypothesis testing, the test statistic (e.g. $F$ , $t$ , $r$ ) with confidence intervals, effect sizes, degrees of freedom and $P$ value noted<br><i>Give <math>P</math> values as exact values whenever suitable.</i>                            |
| <input checked="" type="checkbox"/> | <input type="checkbox"/> For Bayesian analysis, information on the choice of priors and Markov chain Monte Carlo settings                                                                                                                                                                      |
| <input checked="" type="checkbox"/> | <input type="checkbox"/> For hierarchical and complex designs, identification of the appropriate level for tests and full reporting of outcomes                                                                                                                                                |
| <input type="checkbox"/>            | <input checked="" type="checkbox"/> Estimates of effect sizes (e.g. Cohen's $d$ , Pearson's $r$ ), indicating how they were calculated                                                                                                                                                         |

*Our web collection on [statistics for biologists](#) contains articles on many of the points above.*

### Software and code

Policy information about [availability of computer code](#)

Data collection

Data analysis

For manuscripts utilizing custom algorithms or software that are central to the research but not yet described in published literature, software must be made available to editors and reviewers. We strongly encourage code deposition in a community repository (e.g. GitHub). See the Nature Portfolio [guidelines for submitting code & software](#) for further information.

### Data

Policy information about [availability of data](#)

All manuscripts must include a [data availability statement](#). This statement should provide the following information, where applicable:

- Accession codes, unique identifiers, or web links for publicly available datasets
- A description of any restrictions on data availability
- For clinical datasets or third party data, please ensure that the statement adheres to our [policy](#)

## Field-specific reporting

Please select the one below that is the best fit for your research. If you are not sure, read the appropriate sections before making your selection.

Life sciences  Behavioural & social sciences  Ecological, evolutionary & environmental sciences

For a reference copy of the document with all sections, see [nature.com/documents/nr-reporting-summary-flat.pdf](https://www.nature.com/documents/nr-reporting-summary-flat.pdf)

## Behavioural & social sciences study design

All studies must disclose on these points even when the disclosure is negative.

|                   |                                                                                                                                                                                                                                                                                                                                                                                                                                                                                                                                                                                   |
|-------------------|-----------------------------------------------------------------------------------------------------------------------------------------------------------------------------------------------------------------------------------------------------------------------------------------------------------------------------------------------------------------------------------------------------------------------------------------------------------------------------------------------------------------------------------------------------------------------------------|
| Study description | Neurosurgeons, neurosurgical fellows, neurosurgical residents, and medical students were invited to participate in the trial. Neurosurgery residents indicated the year of training (post-graduate year) they are currently in in their six-year program. All neurosurgical fellows were considered as post-graduate year seven. Performance data was collected through the NeuroVR surgical simulation platform (CAE Healthcare, Montreal, Quebec, Canada). This platform recorded quantitative information during the simulated tasks as described in detail in the manuscript. |
| Research sample   | This study utilized a previously collected data that is currently available at the Neurosurgical Simulation and Artificial Intelligence Learning Centre.                                                                                                                                                                                                                                                                                                                                                                                                                          |
| Sampling strategy | This study utilized a previously collected data that belongs to 50 participants. Participants were categorized based on their expertise levels in neurosurgical operative procedures: (1) neurosurgeons, (2) neurosurgical senior residents (post-graduate year 4-6 and neurosurgical fellows), (3) neurosurgical junior residents (post-graduate year 1-3), and (4) medical students.                                                                                                                                                                                            |
| Data collection   | Participants carried out the simulated tumor resections on the NeuroVR platform (CAE Healthcare, Montreal, Quebec, Canada) a total of six times. A researcher accompanied each participant to help them to get familiar with the simulation platform before starting the task. Two simulated tasks were utilized: (1) a practice tumor resection task and (2) complex realistic brain tumor resection task. Participants were given 3 minutes limit for task-1 and 13 minutes limit for task-2. Task-1 was repeated five times and task-2 was done once by the participants.      |
| Timing            | The data was collected between March 1, 2015, and May 31, 2016. Data was recorded in a single time point, no-follow up was carried out.                                                                                                                                                                                                                                                                                                                                                                                                                                           |
| Data exclusions   | No data was excluded during the conduct of the study.                                                                                                                                                                                                                                                                                                                                                                                                                                                                                                                             |
| Non-participation | No participant declined to participate nor was excluded in this study.                                                                                                                                                                                                                                                                                                                                                                                                                                                                                                            |
| Randomization     | Participants were grouped based on whether they are practicing neurosurgeons, or trainees in neurosurgical training or medical students. Trainees in neurosurgical training were separated into two groups: seniors, and juniors. Based on intra-operative exposure, residents who are between post-graduation year (PGY)-4 and PGY-6 and neurosurgical fellows were considered as 'senior trainees'. Residents who are between PGY-1 and PGY-3 were considered as 'junior trainees'.                                                                                             |

## Reporting for specific materials, systems and methods

We require information from authors about some types of materials, experimental systems and methods used in many studies. Here, indicate whether each material, system or method listed is relevant to your study. If you are not sure if a list item applies to your research, read the appropriate section before selecting a response.

### Materials & experimental systems

| n/a                                 | Involved in the study                                           |
|-------------------------------------|-----------------------------------------------------------------|
| <input checked="" type="checkbox"/> | <input type="checkbox"/> Antibodies                             |
| <input checked="" type="checkbox"/> | <input type="checkbox"/> Eukaryotic cell lines                  |
| <input checked="" type="checkbox"/> | <input type="checkbox"/> Palaeontology and archaeology          |
| <input checked="" type="checkbox"/> | <input type="checkbox"/> Animals and other organisms            |
| <input type="checkbox"/>            | <input checked="" type="checkbox"/> Human research participants |
| <input checked="" type="checkbox"/> | <input type="checkbox"/> Clinical data                          |
| <input checked="" type="checkbox"/> | <input type="checkbox"/> Dual use research of concern           |

### Methods

| n/a                                 | Involved in the study                           |
|-------------------------------------|-------------------------------------------------|
| <input checked="" type="checkbox"/> | <input type="checkbox"/> ChIP-seq               |
| <input checked="" type="checkbox"/> | <input type="checkbox"/> Flow cytometry         |
| <input checked="" type="checkbox"/> | <input type="checkbox"/> MRI-based neuroimaging |

## Human research participants

Policy information about [studies involving human research participants](#)

|                            |                                                                                                                                                         |
|----------------------------|---------------------------------------------------------------------------------------------------------------------------------------------------------|
| Population characteristics | Neurosurgeons, neurosurgical fellows, neurosurgical residents, and medical students from a single institution were invited to participate in the trial. |
|----------------------------|---------------------------------------------------------------------------------------------------------------------------------------------------------|

Recruitment

Neurosurgeons, neurosurgical fellows, neurosurgical residents, and medical students were invited to participate in the trial. The study was conducted to develop an intelligent system to learn participants' existing expert and novice operative skillsets. The medical student cohort included students who may have interest in surgery. The authors believe that the cohort represents the future real-life use of the intelligent system outlined.

Ethics oversight

McGill University Health Centre Research Ethics Board, Neurosciences-Psychiatry

Note that full information on the approval of the study protocol must also be provided in the manuscript.
