# Supplementary material for: Continuous monitoring of surgical bimanual expertise using deep neural networks in virtual reality simulation
Source: PubMed Central journal article supplement (PMC9042967; doi:10.1038/s41746-022-00596-8), 2022-04-26
Supplement: 41746_2022_596_MOESM2_ESM.pdf [file 41746_2022_596_MOESM2_ESM.pdf]

1 **Supplementary information**

2

3 **Continuous Monitoring of Surgical Bimanual Expertise Using Deep Neural Networks in**  
4 **Virtual Reality Simulation**

5 Recai Yilmaz<sup>1\*</sup>, Alexander Winkler-Schwartz<sup>1,2</sup>, Nykan Mirchi<sup>1</sup>, Aiden Reich<sup>1</sup>, Sommer

6 Christie<sup>1</sup>, Dan Huy Tran<sup>1</sup>, Nicole Ledwos<sup>1</sup>, Ali M. Fazlollahi<sup>1</sup>, Carlo Santaguida<sup>2</sup>, Abdulrahman

7 J. Sabbagh<sup>3,4</sup>, Khalid Bajunaid<sup>5</sup>, Rolando Del Maestro<sup>1,2</sup>

8

9 <sup>1</sup> Neurosurgical Simulation and Artificial Intelligence Learning Centre, Department of  
10 Neurology & Neurosurgery, Montreal Neurological Institute, McGill University, 3801

11 University Street, Room E2.89, H3A 2B4, Montreal, Quebec, Canada.

12 <sup>2</sup> Department of Neurology and Neurosurgery, Montreal Neurological Institute and hospital,  
13 McGill University, Montreal, Quebec, Canada.

14 <sup>3</sup> Division of Neurosurgery, Department of Surgery, College of Medicine, King Abdulaziz  
15 University, Jeddah, Saudi Arabia.

16 <sup>4</sup> Clinical Skills and Simulation Center, King Abdulaziz University, Jeddah, Saudi Arabia.

17 <sup>5</sup> Department of Surgery, Faculty of Medicine, University of Jeddah, Jeddah, Saudi Arabia.

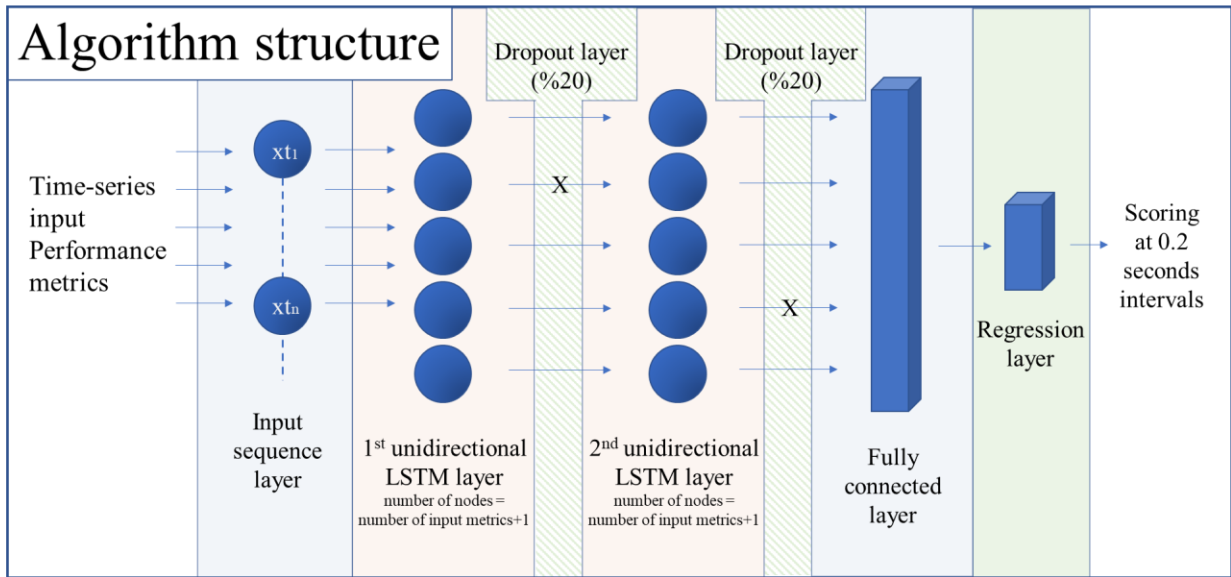

18

19 **Supplementary Figure 1: Algorithm structure.**

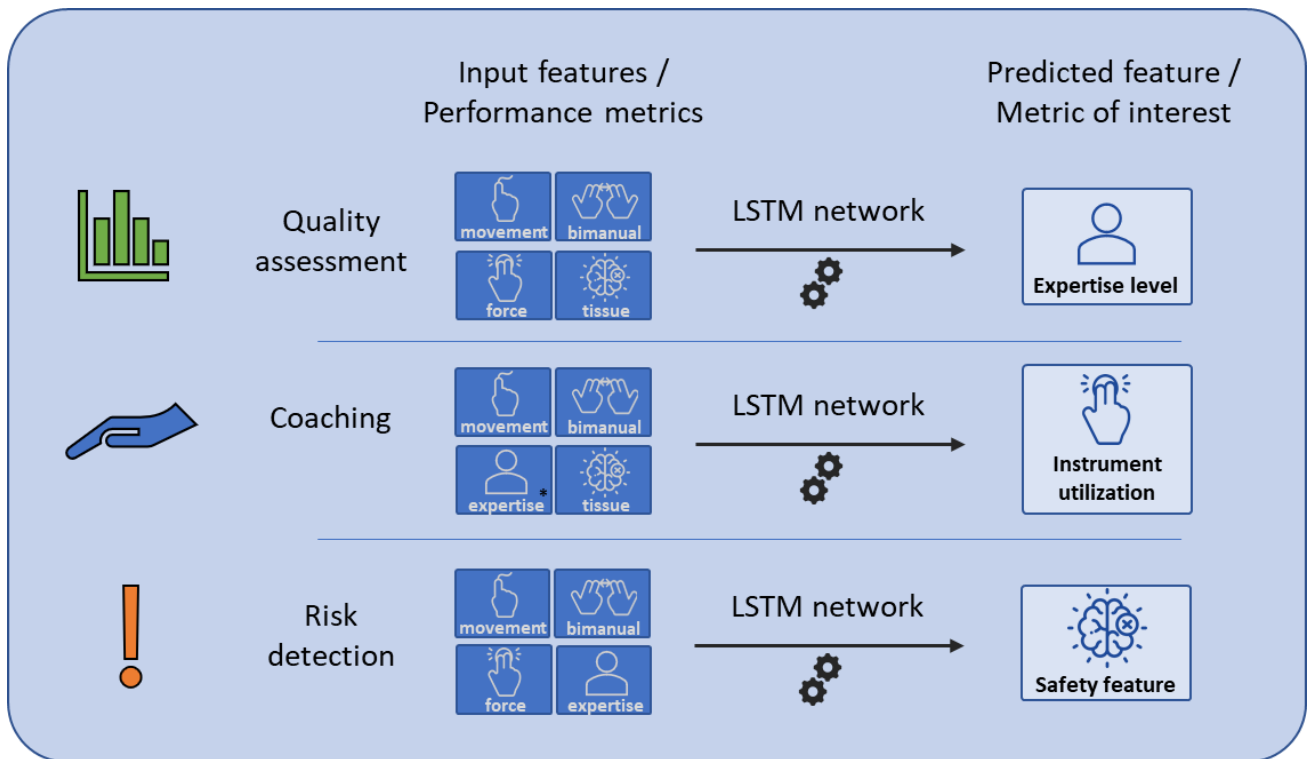

20

21 **Supplementary Figure 2: Applications of the ICEMS.** Our system can be used for three  
 22 applications. When the expertise level defined as the output feature, a quality assessment of the  
 23 performance can be made. When a feature relating instrument utilization or operative factor is  
 24 outputted coaching can be provided (\*expertise is inputted as the expert level). When a safety  
 25 metric defined as the output, a risk detection algorithm can be developed.

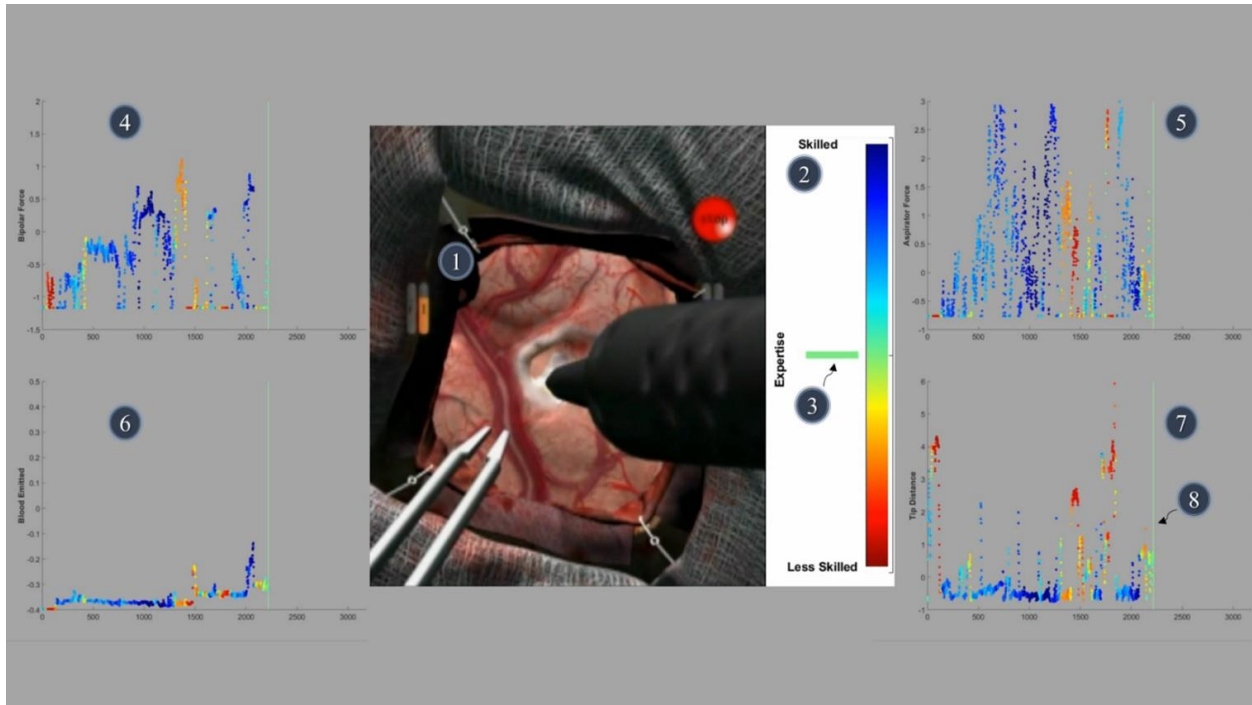

26

27 **Supplementary Figure 3: Legend of Supplementary Video-1 and Supplementary Video-2.**

28 This video represents the expertise assessment made by the ICEMS in relation to 4 of the 16  
 29 critical performance metrics inputted to the algorithm. Middle screen (1) shows the user view  
 30 during the virtual reality surgical task. The color bar (2) represents the assessment made from  
 31 skilled -blue- to less skilled -red- levels of expertise, shown by the colored indicator (3) at 0.2-  
 32 second intervals. Four scatter plots, for each critical features including aspirator force (5), bipolar  
 33 force (4), tip distance (7) and blood emitted (6), represent how the expertise assessment relates to  
 34 these metrics. In these graphs, each dot represents an expertise assessment made by the ICEMS  
 35 by its color (according to the color bar (2)), at each 0.2-second intervals. Colored dots are drawn  
 36 according to the expertise level determined by the algorithm as the time progress, same color as  
 37 (3) and the colored time indicator (8). x-axis show the number of decisions made. During this  
 38 >10min task more 3000 assessments were made. y-axis show the z-score values for each  
 39 performance metric. Higher values indicate higher force applied at (4) and (5) with bipolar and

40 aspirator, respectively. High values indicate high bleeding rate at (6) and instrument tip  
41 separation at (7). The colored time indicator (8) proceeds on the y-axis.

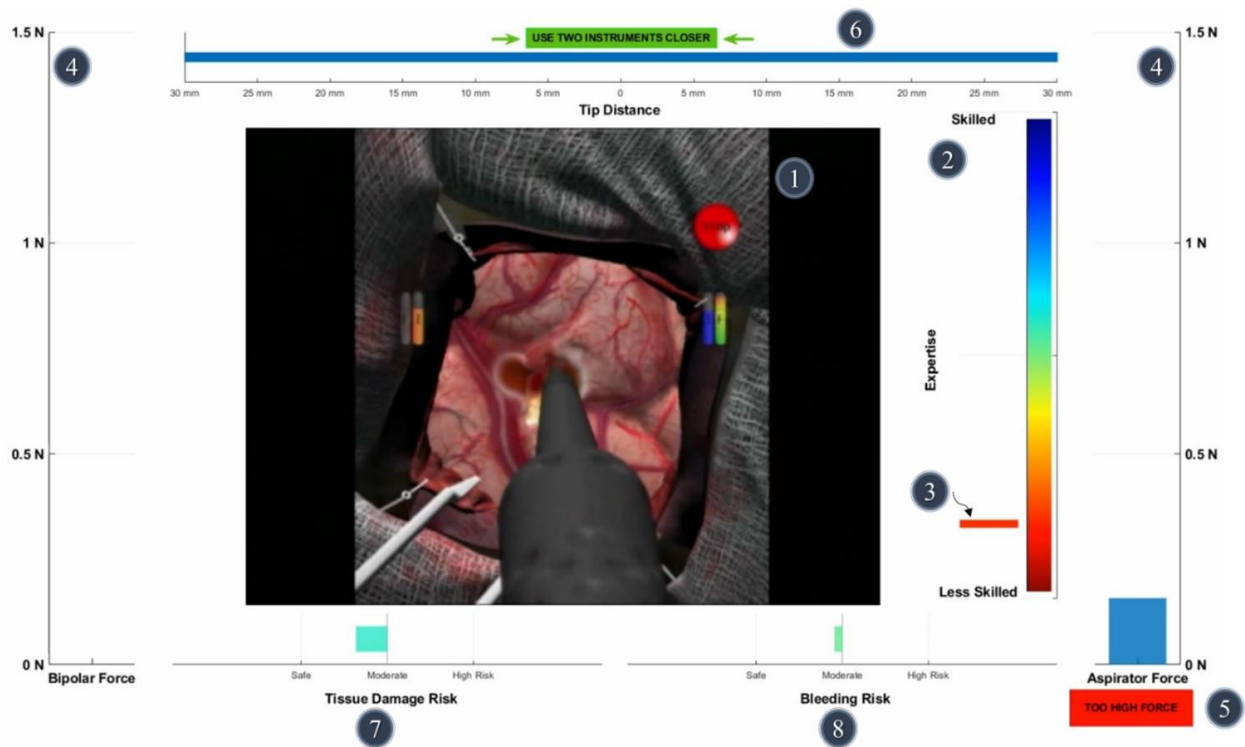

42

43 **Supplementary Figure 4: Legend of Supplementary Video-3 and Supplementary Video-4.**

44 The ICEMS composed of three modules: assessment, coaching and risk detection. Middle screen  
 45 (1) shows the user view during surgical performance. The color bar (2) represents the assessment  
 46 module where the assessment is made at 0.2-second intervals between skilled -blue- and less  
 47 skilled -red- levels and shown by the colored indicator (3). In this example coaching is provided  
 48 for three critical metrics: aspirator force utilized, bipolar forceps force utilized and instrument tip  
 49 separation distance. The bars (4) show the amount of force applied by bipolar (4-left) and  
 50 aspirator (4-right). Two background algorithms calculate the expected force applied for expert  
 51 level instrument utilization. If the expected value is one standard deviation below the actual  
 52 value a warning (5) 'too high force' is given. If the expected value is one standard deviation  
 53 above the actual value a warning 'use bipolar/aspirator more efficiently' is given. The top bar (6)  
 54 shows the distance between the tip of the two instruments. A background algorithm calculates

55 the expected tip separation distance for expert level instrument utilization. If the expected level is  
56 one standard deviation below the actual value, a warning 'use two instruments together' is  
57 shown. The risks related to two critical features were detected: tissue (healthy brain) damage risk  
58 **(7)**, and bleeding risk **(8)**. The moderate risk level equals the average risk achieved by all  
59 individuals within our dataset, where  $z\text{-score}=0$ . Higher values indicated behaviour with high  
60 risk and lower values indicated safe behaviour.

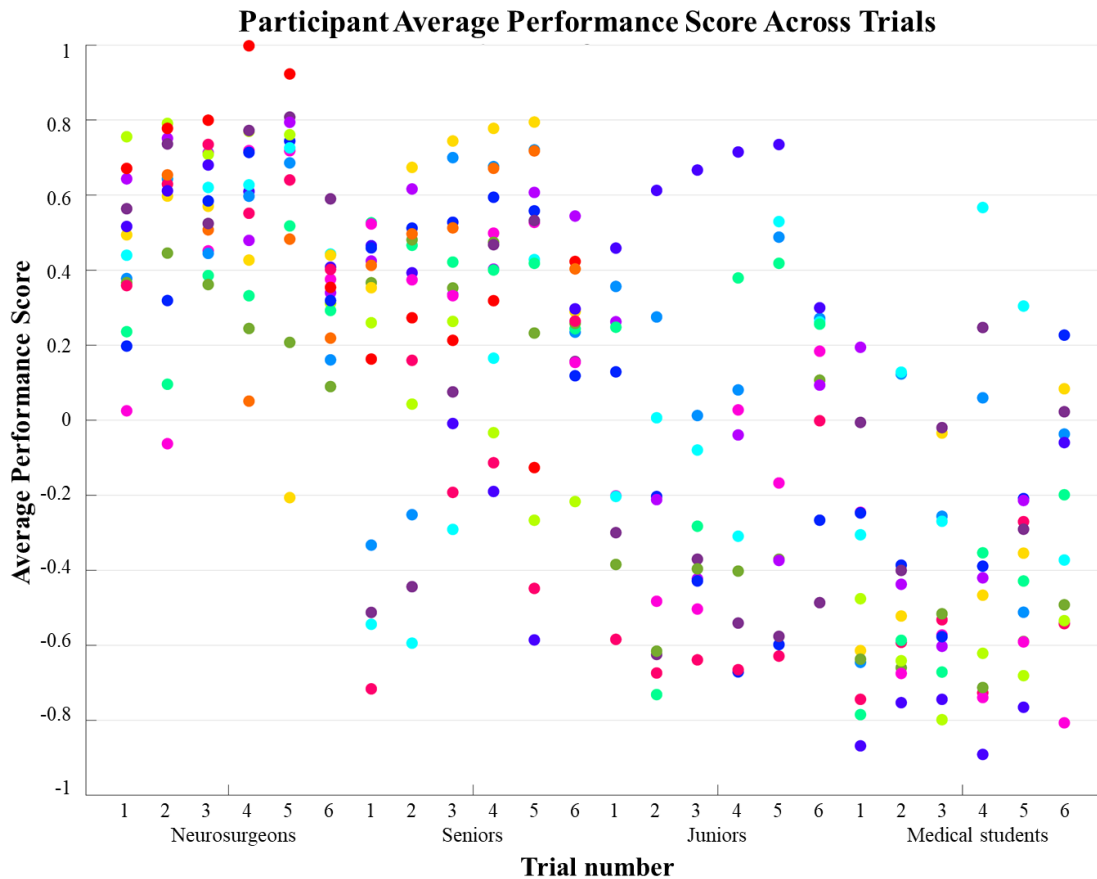

61

62 **Supplementary Figure 5: Participant Average Performance Score Across Trials.** X-axis  
 63 represents the trial numbers from first to sixth repeat for each expertise group. Trial number 1 to  
 64 5 belongs to the practice trial while trial number 6 indicates the realistic scenario. Y-axis  
 65 represents the average performance score. Participant scores at each task is indicated with a  
 66 colored dot. Same color was utilized within the same expertise group for each participant. Data  
 67 that belongs to a neurosurgeon for the fifth repeat was not available.



|                        | TRAINING RMSE | VALIDATION RMSE | TESTING RMSE |
|------------------------|---------------|-----------------|--------------|
| <b>Expertise</b>       | 0.7065        | 0.7097          | 0.7525       |
| <b>Force Aspirator</b> | 0.8169        | 1.0648          | 0.8994       |
| <b>Force Bipolar</b>   | 0.6859        | 0.7939          | 0.6647       |
| <b>Tip Distance</b>    | 0.6611        | 0.7166          | 0.6786       |
| <b>Tissue Damage</b>   | 0.8791        | 0.8377          | 0.7998       |
| <b>Bleeding</b>        | 0.6910        | 0.6200          | 0.6099       |

RMSE: root-mean-squared-error

68

69 **Supplementary Table 1: Root-mean-squared-error (RMSE) values obtained.** A total of six  
70 algorithms were trained for assessment, coaching and risk detection. The training accuracy was  
71 monitored by root-mean-squared error (RMSE) values. During algorithm training, overfitting  
72 happens when the model fits a dataset too closely preventing accurate prediction on a new  
73 dataset (low generalizability). To avoid this problem the separate validation dataset was used to  
74 monitor the training progress. A training was acceptable when the RMSEs for training and  
75 validation datasets decreased in tandem and stay aligned by the end of the training. After the  
76 training was complete, the separate testing dataset was used to check the final state of the  
77 training. Having no gold standard, close values for training, validation and testing were targeted  
78 to help reject overfitting.

| Assessment made                 | Input features                                                                                                                                                                                                                                               | Output feature                        | Explanation                                                                                                                                                                                                                                                                                                                    |
|---------------------------------|--------------------------------------------------------------------------------------------------------------------------------------------------------------------------------------------------------------------------------------------------------------|---------------------------------------|--------------------------------------------------------------------------------------------------------------------------------------------------------------------------------------------------------------------------------------------------------------------------------------------------------------------------------|
| Performance assessment          | 1, 2, 3, 4, 5, 6, 7, 8, 9, 10, 11, 12, 13, 14, 15, 16                                                                                                                                                                                                        | 0- Expertise                          | This algorithm makes a global expertise assessment given the 16 input features.                                                                                                                                                                                                                                                |
| Aspirator utilization           | 0*, 2, 3, 5, 6, 7, 8, 9, 10, 11, 12, 13, 14, 15, 16<br>*inputted as always '1'.<br>Excluded 4 because the output feature is a parent feature.                                                                                                                | 1- Force Utilized by Aspirator        | This algorithm predicts the amount of force utilization expected for expert level ('1'), for specific action being performed. Predicted values can be used to coach a trainee. The output metric represents a safety and efficiency feature. A trainee is expected use aspirator efficiently while avoiding high forces.       |
| Bipolar forceps utilization     | 0*, 1, 3, 4, 6, 7, 8, 9, 10, 11, 12, 13, 14, 15, 16<br>*inputted as always '1'.<br>Excluded 5 because the output feature is a parent feature.                                                                                                                | 2- Force Utilized by Bipolar Forceps  | This algorithm predicts the amount of force utilization expected for expert level ('1'), for specific action being performed. Predicted values can be used to coach a trainee. The output metric represents a safety and efficiency feature. A trainee is expected use bipolar forceps efficiently while avoiding high forces. |
| Bimanual instrument utilization | 0*, 1, 2, 4, 5, 6, 7, 8, 9, 11, 12, 13, 14, 15, 16<br>*inputted as always '1'.<br>Excluded 10 because the output feature is a parent feature.                                                                                                                | 3- Instrument Tip Separation Distance | This algorithm predicts how close the two instruments should be during the action being performed for expert level ('1'). Predicted values can be used to coach a trainee. The output metric represents the bimanual cognitive. A trainee is expected use the tips of the two instruments closely together.                    |
| Bleeding risk detection         | 0*, 1, 2, 3, 4, 5, 6, 7, 8, 9, 10, 11, 12<br>*inputted aligned with the expertise level of the user (expert: '1', seniors: '0.33', juniors: '-0.33', medical student: '-1').<br>Excluded 14, 15, 16 because the output feature is a closely related feature. | 13- Bleeding Speed                    | This algorithm predicts bleeding rate during the action being performed. The output metric represents a safety feature.                                                                                                                                                                                                        |
| Tissue damage risk detection    | 0*, 1, 2, 3, 4, 5, 6, 7, 8, 9, 10, 11, 13, 14, 15, 16<br>*inputted aligned with the expertise level of the user (expert: '1', seniors: '0.33', juniors: '-0.33', medical student: '-1').<br>No feature exclusion was made.                                   | 12- Healthy Tissue Removed            | This algorithm predicts damage to the healthy surrounding tissue during the action being performed. The output metric represents a safety feature.                                                                                                                                                                             |

**Number coded features:** 0- Expertise, 1- Force Utilized by Aspirator, 2- Force Utilized by Bipolar Forceps, 3- Instrument Tip Separation Distance, 4- Force Change Aspirator, 5- Force Change Bipolar Forceps, 6- Aspirator Velocity, 7- Bipolar Forceps Velocity, 8- Aspirator Acceleration, 9- Bipolar Forceps Acceleration, 10- Instrument Tip Separation Distance Change, 11- Tumor Volume Removed, 12- Healthy Tissue Removed, 13- Bleeding Speed, 14- Blood Pooling, 15- Total Blood Loss, 16- Blood Pooling Change

79

80 **Supplementary Table 2: Input and output features (metric of interest) for each trained**  
81 **algorithm.** Colors indicate the three categories of application: (1- green) expertise assessment,  
82 (2- blue) coaching, and (3- red) risk assessment.

83

84

85

|                                | Trainee ID | Post Graduate Year of Training | Number of times assisted in subpial resection | Number of times carried out partial subpial resection | Number of times carried out complete subpial resection | Average Score |
|--------------------------------|------------|--------------------------------|-----------------------------------------------|-------------------------------------------------------|--------------------------------------------------------|---------------|
| Neurosurgical Fellows          | 1          | 7                              | 110                                           | 85                                                    | 32                                                     | 0.488         |
|                                | 2          | 7                              | 4                                             | 4                                                     | 4                                                      | 0.461         |
|                                | 3          | 7                              | 31                                            | 22                                                    | 34                                                     | 0.361         |
|                                | 4          | 7                              | 36                                            | 4                                                     | 6                                                      | 0.046         |
| Neurosurgical Senior Residents | 5          | 6                              | 0                                             | 0                                                     | 2                                                      | -0.175        |
|                                | 6          | 6                              | 24                                            | 16                                                    | 12                                                     | 0.401         |
|                                | 7          | 6                              | 0                                             | 20                                                    | 45                                                     | 0.062         |
|                                | 8          | 5                              | 24                                            | 20                                                    | 7                                                      | -0.096        |
|                                | 9          | 5                              | 133                                           | 130                                                   | 5                                                      | 0.605         |
|                                | 10         | 4                              | 18                                            | 3                                                     | 0                                                      | 0.291         |
|                                | 11         | 4                              | 2                                             | 1                                                     | 0                                                      | 0.413         |
|                                | 12         | 4                              | 3                                             | 1                                                     | 0                                                      | 0.008         |
|                                | 13         | 4                              | 57                                            | 30                                                    | 10                                                     | 0.536         |
|                                | 14         | 4                              | 2                                             | 2                                                     | 0                                                      | 0.211         |
| Neurosurgical Junior Residents | 15         | 3                              | 3                                             | 1                                                     | 0                                                      | -0.191        |
|                                | 16         | 3                              | 8                                             | 35                                                    | 7                                                      | -0.115        |
|                                | 17         | 3                              | 15                                            | 12                                                    | 3                                                      | 0.581         |
|                                | 18         | 3                              | 0                                             | 0                                                     | 0                                                      | 0.247         |
|                                | 19         | 2                              | 3                                             | 0                                                     | 0                                                      | -0.532        |
|                                | 20         | 2                              | 1                                             | 0                                                     | 0                                                      | 0.048         |
|                                | 21         | 1                              | 0                                             | 0                                                     | 0                                                      | -0.340        |
|                                | 22         | 1                              | 0                                             | 0                                                     | 0                                                      | 0.034         |
|                                | 23         | 1                              | 1                                             | 2                                                     | 0                                                      | -0.344        |
|                                | 24         | 1                              | 24                                            | 0                                                     | 0                                                      | -0.483        |

86

87 **Supplementary Table 3: Trainee self-reported subpial resection operative experience and**

88 **trainee average ICEMS scores.** Trainees reported the number of subpial procedures they

89 involved in, including epilepsy cases, and frontal, temporal, and occipital brain tumor surgical

90 procedures. Right-most column shows the trainee average expertise score rated across six

91 simulation trials by the ICEMS. Neurosurgical fellows were considered in 7th year in training.
